# Supplementary material
Source: Springer Nature journal article supplement (https://www.springermedizin.de/resource/supplementary/12913_2009_1409_MOESM6_ESM.pdf/9528078)

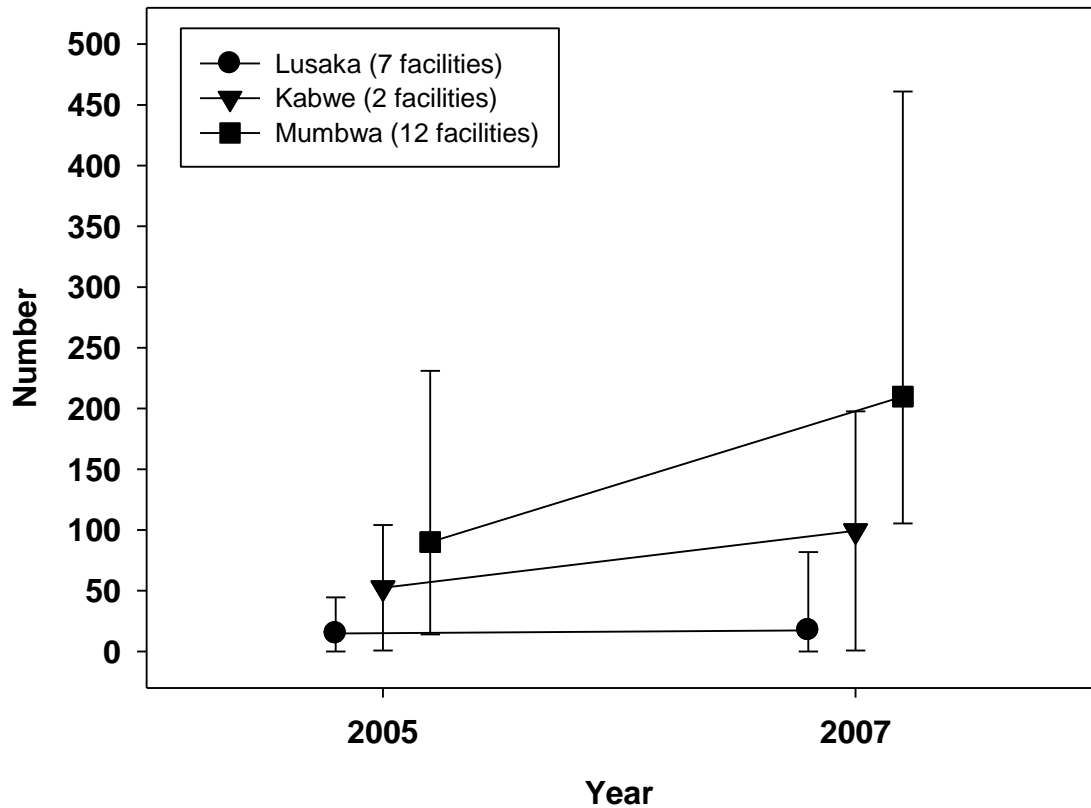

Supplement: MOESM6 [file 9528078]
